# Supplementary material for: Measurement report: Insight into Greenhouse Gas Emission Characteristics of Light-Duty Vehicles in China Driven by Technological Innovation
Source: Copernicus journal article supplement (doi:10.5194/egusphere-2024-3095), 2024-11-11
Supplement: Supplementary file [file egusphere-2024-3095-AC1-supplement.pdf]

## Response to Reviewer #1:

With the upcoming China-7 regulation including GHG as a new criteria for the control of new vehicle emissions, this research presents good innovation and solid scientific basis, and its findings makes important contributions to addressing the gap in GHG emission factors for motor vehicles in China. Additionally, this study provides valuable data to support the estimation of total greenhouse gas emissions in the country. I recommend acceptance minor revisions. Some issues listed below need further take-of-care.

**Response:** We greatly appreciate your valuable suggestions that would help us improve the manuscript. Below is our response to the specific comments, highlighted in blue, with changes to the manuscript highlighted in red.

1. It is recommended that the authors add a comparison of this study's results with previously reported findings. For instance, incorporating a table that summarizes some of the published results would provide readers with a more intuitive understanding of GHG emissions from vehicles.

**Response:** Thank you for the valuable comment. We have added the comparison of GHG emission factors in the various studies in Table S1 in the Supplementary Information. Additionally, we have added the related description in Section 3.1.

**Section 3.1:** A comparison with previous studies shows that the CH<sub>4</sub> emissions for China V and China VI vehicles in our study were lower than those for Euro 5 and Euro 6 vehicles reported by Clairotte et al. (2020), and a similar trend was observed for N<sub>2</sub>O emissions, as demonstrated by the summary of previous studies provided in Table S1 in the Supplementary Information. Furthermore, lower CO<sub>2</sub> emissions was found in our study than those for gasoline vehicles reported by Zhu et al. (2022) and Wang et al. (2022b) as well as those for diesel vehicles reported by Wu et al. (2017), Cai and Xie (2010), Wang et al. (2022a), and Li et al. (2024) in Table S1 in the Supplementary Information.

The Table S1 is presented in the next page.

**Table S1** Comparison of CO<sub>2</sub>, CH<sub>4</sub>, and N<sub>2</sub>O emission factors in different studies.

| GH<br>G         | Tested vehicles                             | Fuel<br>types | Methods                | Emission factors                                                                                                                                                                                                                    | References                |
|-----------------|---------------------------------------------|---------------|------------------------|-------------------------------------------------------------------------------------------------------------------------------------------------------------------------------------------------------------------------------------|---------------------------|
| CO <sub>2</sub> | China 6                                     | Gasoline      | PEMS <sup>1</sup>      | 313.7 g/km (urban area, expressway)<br>304.4 g/km (suburban area, expressway)                                                                                                                                                       | (Zhu et al., 2022)        |
|                 | China 6                                     | Gasoline      | PEMS                   | 275.7 g/km (urban area, expressway)<br>273.9 g/km (suburban area, expressway)                                                                                                                                                       | (Zhu et al., 2022)        |
|                 | China 6                                     | Gasoline      | Chassis<br>dynamometer | $\approx$ 300 g/km (-10 °C, cold start, TWC <sup>2</sup> )<br>$\approx$ 289 g/km (0 °C, cold start, TWC)<br>$\approx$ 230 g/km (23 °C, cold start, TWC)<br>$\approx$ 259 g/km (40 °C, cold start, TWC)                              | (Wang et al., 2022b)      |
|                 |                                             |               |                        | $\approx$ 257 g/km (-10 °C, cold start, TWC + GPF <sup>3</sup> )<br>$\approx$ 259 g/km (0 °C, cold start, TWC + GPF)<br>$\approx$ 210 g/km (23 °C, cold start, TWC + GPF)<br>$\approx$ 238 g/km (40 °C, cold start, TWC + GPF)      |                           |
|                 | UK fleet using<br>2015 new car<br>sales car | Gasoline      | PEMS                   | 175.2 g/km (urban conditions, extra small displacement)<br>199.2 g/km (urban conditions, small displacement)<br>231.5 g/km (urban conditions, medium displacement)<br>340.9 g/km (urban conditions, large displacement)             | (O'Driscoll et al., 2018) |
|                 |                                             |               |                        | 140.6 g/km (motorway conditions, extra small displacement)<br>154.3 g/km (motorway conditions, small displacement)<br>174.4 g/km (motorway conditions, medium displacement)<br>213.0 g/km (motorway conditions, large displacement) |                           |
|                 | China 0 ~ China 2                           | Diesel        | IVE <sup>4</sup>       | 409.9 g/km                                                                                                                                                                                                                          | (Yao et al., 2011)        |
|                 | China 2                                     | Diesel        | COPERT <sup>5</sup>    | 245.8 g/km                                                                                                                                                                                                                          | (Cai and Xie, 2010)       |
|                 | China 3                                     | Diesel        | COPERT                 | 238.2 g/km                                                                                                                                                                                                                          | (Cai and Xie, 2010)       |
|                 | China 3                                     | Diesel        | PEMS                   | 304 g/km                                                                                                                                                                                                                            | (Wu et al., 2017)         |
|                 | China 4                                     | Diesel        | PEMS                   | 310 g/km                                                                                                                                                                                                                            |                           |
|                 | China 4                                     | Diesel        | COPERT                 | 238.2 g/km                                                                                                                                                                                                                          | (Cai and Xie, 2010)       |

|                 |                                       |             |                     |                                                       |                             |
|-----------------|---------------------------------------|-------------|---------------------|-------------------------------------------------------|-----------------------------|
|                 | China 4                               | Diesel      | Chassis dynamometer | 214.1 g/km (NEDC <sup>6</sup> )                       | (Wang et al., 2022a)        |
|                 |                                       |             |                     | 209.7 g/km (WLTC <sup>7</sup> )                       |                             |
|                 | China 4                               | Diesel      | PEMS                | 415.06 g/km                                           | (Li et al., 2024)           |
|                 | China 5                               | Diesel      | PEMS                | 447.48 g/km                                           |                             |
|                 | China 6                               | Diesel      | PEMS                | 335.26 g/km                                           |                             |
|                 | Euro 6                                | Diesel      | Chassis dynamometer | 239.0 g/km                                            | (Vojtišek-Lom et al., 2018) |
|                 |                                       |             |                     | 133 g/km                                              |                             |
|                 |                                       |             |                     | 134 g/km                                              |                             |
|                 | UK fleet using 2015 new car sales car | Diesel      | PEMS                | 141.9 g/km (urban conditions, small displacement)     | (O'Driscoll et al., 2018)   |
|                 |                                       |             |                     | 163.4 g/km (urban conditions, medium displacement)    |                             |
|                 |                                       |             |                     | 205.1 g/km (urban conditions, large displacement)     |                             |
|                 |                                       |             |                     | 137.1 g/km (motorway conditions, small displacement)  |                             |
| CH <sub>4</sub> | Heavy-duty vehicles in Korea          | Diesel      | Chassis dynamometer | 149.0 g/km (motorway conditions, medium displacement) | (Seo et al., 2018)          |
|                 |                                       |             |                     | 170.0 g/km (motorway conditions, large displacement)  |                             |
|                 |                                       |             |                     | 320 g/km (case 1)                                     |                             |
|                 |                                       |             |                     | 411 g/km (case 2)                                     |                             |
|                 |                                       |             |                     | 634 g/km (case 3)                                     |                             |
|                 |                                       |             |                     | 727 g/km (case 4)                                     |                             |
|                 |                                       |             |                     | 877 g/km (case 5)                                     |                             |
|                 | Euro 5                                | Gasoline    | Chassis dynamometer | 537 g/km (case 6)                                     | (Clairotte et al., 2020)    |
|                 |                                       |             |                     | 4.8 mg/km                                             |                             |
|                 |                                       |             |                     | 3.2 mg/km                                             |                             |
|                 |                                       |             |                     | 1.7 mg/km                                             |                             |
|                 |                                       |             |                     | 0.8 mg/km                                             |                             |
|                 |                                       |             |                     | 4.5 mg/km                                             |                             |
|                 | Euro 6b                               | Dual-LPG/Ga |                     | 2.3 mg/km                                             |                             |

|                  |                   |                 |                     |            |                             |
|------------------|-------------------|-----------------|---------------------|------------|-----------------------------|
|                  |                   | soline          |                     |            |                             |
|                  | Euro 5            | Diesel          |                     | 3.6 mg/km  |                             |
|                  | Euro 6b/c         | Diesel          |                     | 10.3 mg/km |                             |
|                  | Euro 6d-TEMP      | Diesel          |                     | 3.6 mg/km  |                             |
|                  | China 0           | Diesel          | COPERT              | 18 mg/km   | (Wang et al., 2022a)        |
|                  | China 1           | Diesel          | COPERT              | 11 mg/km   |                             |
|                  | China 2           | Diesel          | COPERT              | 5 mg/km    |                             |
|                  | China 0 ~ China 2 | Diesel          | IVE                 | 90 mg/km   | (Yao et al., 2011)          |
|                  | China 2           | Diesel          | COPERT              | 7 mg/km    | (Cai and Xie, 2010)         |
|                  | China 3           | Diesel          | COPERT              | 2 mg/km    | (Wang et al., 2022a)        |
|                  | China 3           | Diesel          | COPERT              | 0 mg/km    | (Cai and Xie, 2010)         |
|                  | China 4           | Diesel          | COPERT              | 1 mg/km    | (Wang et al., 2022a)        |
|                  | China 4           | Diesel          | COPERT              | 0 mg/km    | (Cai and Xie, 2010)         |
|                  | China 4           | Diesel          | PEMS                | 5 mg/km    | (Li et al., 2024)           |
|                  | China 5           | Diesel          | COPERT              | 1 mg/km    | (Wang et al., 2022a)        |
|                  | China 5           | Diesel          | PEMS                | 3 mg/km    | (Li et al., 2024)           |
|                  | China 6           | Diesel          | PEMS                | 3 mg/km    | (Li et al., 2024)           |
|                  | Euro 6            | Diesel          | Chassis dynamometer | 3 mg/km    | (Vojtíšek-Lom et al., 2018) |
|                  |                   |                 |                     | 5 mg/km    |                             |
|                  |                   |                 |                     | 7 mg/km    |                             |
| N <sub>2</sub> O | Euro 5            | Gasoline        | Chassis dynamometer | 3.1 mg/km  | (Clairotte et al., 2020)    |
|                  | Euro 6b/c         | Gasoline        |                     | 0.9 mg/km  |                             |
|                  | Euro 6d-TEMP      | Gasoline        |                     | 0.3 mg/km  |                             |
|                  | Euro 5            | Gasoline hybrid |                     | 0.3 mg/km  |                             |
|                  | Euro 6b           | Gasoline hybrid |                     | 3.2 mg/km  |                             |
|                  | Euro 6b           | Dual-LPG/Ga     |                     | 0.9 mg/km  |                             |

|  |                   |        |                            |            |                             |
|--|-------------------|--------|----------------------------|------------|-----------------------------|
|  |                   | soline |                            |            |                             |
|  | Euro 5            | Diesel |                            | 6.2 mg/km  |                             |
|  | Euro 6b/c         | Diesel |                            | 13.5 mg/km |                             |
|  | Euro 6d-TEMP      | Diesel |                            | 15.2 mg/km |                             |
|  | China 0 ~ China 2 | Diesel | IVE                        | 197 mg/km  | (Yao et al., 2011)          |
|  | China 0           | Diesel | COPERT                     | 0 mg/km    | (Wang et al., 2022a)        |
|  | China 1           | Diesel | COPERT                     | 2 mg/km    |                             |
|  | China 2           | Diesel | COPERT                     | 5 mg/km    |                             |
|  | China 2           | Diesel | COPERT                     | 167 mg/km  | (Cai and Xie, 2010)         |
|  | China 3           | Diesel | COPERT                     | 8 mg/km    | (Wang et al., 2022a)        |
|  | China 3           | Diesel | COPERT                     | 200 mg/km  | (Cai and Xie, 2010)         |
|  | China 4           | Diesel | COPERT                     | 8 mg/km    | (Wang et al., 2022a)        |
|  | China 4           | Diesel | COPERT                     | 200 mg/km  | (Cai and Xie, 2010)         |
|  | China 4           | Diesel | PEMS                       | 2 mg/km    | (Li et al., 2024)           |
|  | China 4           | Diesel | COPERT                     | 8 mg/km    | (Wang et al., 2022a)        |
|  | China 5           | Diesel | PEMS                       | 4 mg/km    | (Li et al., 2024)           |
|  | China 6           | Diesel | PEMS                       | 3 mg/km    | (Li et al., 2024)           |
|  | Euro 6            | Diesel | Chassis<br>dynamom<br>eter | 13 mg/km   | (Vojtíšek-Lom et al., 2018) |
|  |                   |        |                            | 5 mg/km    |                             |
|  |                   |        |                            | 7 mg/km    |                             |

**Notes:**

<sup>1</sup> Portable Emission Measurement System

<sup>2</sup> Three-Way Catalyst

<sup>3</sup> Gasoline Particulate Filter

<sup>4</sup> International Vehicle Emissions model

<sup>5</sup> Computer Programme to Calculate Emissions from Road Transport

<sup>6</sup> New European Driving Cycle

<sup>7</sup> Worldwide Harmonized Light Vehicles Test Cycle

2. Line 75-76 "vehicular g GHG emissions" seems to be a writing error.

**Response:** Thank you for the helpful suggestions. We have revised accordingly.

The results indicated that vehicular GHG emissions generally tend to increase with engine displacement.

3. In this study, the vehicle with high mileage was labeled as "TWC failed". I am contemplating whether it would be renamed as "TWC deteriorated" vehicle, as the study did not intentionally disable the TWC through removal or tampering but rather defined them based on their high mileage and correspondingly high emissions of conventional pollutants. Therefore, I suggest describing this high-mileage vehicle as "TWC deteriorated" rather than "TWC failed".

**Response:** We appreciate your insightful comments. In this work, rather than deliberately crush TWC to verify complete failure, we used high-mileage vehicles to represent a highly degraded TWC state. While their CO, NO<sub>x</sub>, and THC emissions were substantially elevated (see Figure S1 in the Supplementary Information), we cannot conclusively determine full TWC failure. Thus, as suggested, we have revised "TWC failed" to "TWC deteriorated".

Since the "TWC failed" appears frequently in the manuscript, we have uniformly revised it to "TWC degradation" throughout the manuscript and will not list each instance here. Furthermore, we added some information on Figure S1 in Section 2.1:

Figure S1 in the Supplementary Information demonstrates the emission characteristics of the two vehicles representing distinct TWC operational states: (1) a properly functioning under the "TWC worked" condition and (2) a degraded system under the "TWC deteriorated" condition. The analysis revealed that the "TWC deteriorated" vehicle emitted substantially higher levels of carbon monoxide (CO) and total hydrocarbons (THC), with emission factors elevated by over 24-fold and 97-fold, respectively, compared to the "TWC worked" vehicle.

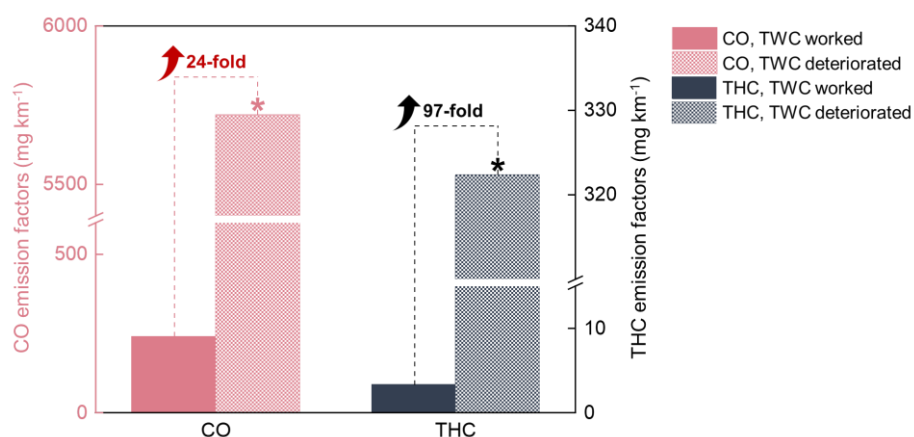

Figure S1. CO and THC emission factors from the fueled taxi fueled by conventional gasoline under the "TWC

worked” and “TWC deteriorated” conditions under the WLTC protocol. The symbol \* represents that the pollutant concentrations exceeded the upper limit of the measurement instrument.

4. Why is some of the information for vehicle #3 missing in Table 1? It is advisable to include descriptions of the reasons for missing data in the notes.

**Response:** The information, including model year, max. net engine power, and max authorized mass of this vehicle, was not unrecorded. Herein, the reason for missing vehicle information has been annotated in Table 1 (marked with superscript “d”).

<sup>d</sup>The unrecorded data, being a non-essential parameter, have no bearing on the subsequent analysis.

5. Line 141. The GWP values of N<sub>2</sub>O and CH<sub>4</sub> are not provided in the formula.

**Response:** Thanks for your valuable comment. We have added an explanation of the GWP values for N<sub>2</sub>O and CH<sub>4</sub> in the text in Section 2.3:

where  $R_{CO_2}$  is the relative growth rate of CO<sub>2</sub>,  $M_i$  denotes the emissions of CH<sub>4</sub> or N<sub>2</sub>O, and  $M_{CO_2}$  denotes the emissions of CO<sub>2</sub>. The GWP of N<sub>2</sub>O and CH<sub>4</sub> is 298 and 25, respectively.

6. The values in the article should retain the same significant figures, for example, the significant figures of the CO<sub>2</sub> emission factor and CH<sub>4</sub> emission factor in line 165 need to be unified.

**Response:** Thanks for your helpful suggestions. We have revised the values as accordingly.

**Section 3.1:** Nevertheless, the emission factors for CO<sub>2</sub> of the China V vehicles (155 g/km for the hot start) were comparable to those of China IV vehicles (151 g/km for the hot start) and those for N<sub>2</sub>O of the China V vehicles (2.0 mg/km for the hot start) even were higher than those of China IV vehicles (1.5 mg/km for the hot start), particularly for hot start mode.

**Section 3.1:** China V vehicles showed a reduction from 2.8 mg/km to 2.2 mg/km, and China VI vehicles from 1.4 mg/km to 1.0 mg/km.

7. Despite the sufficient number of vehicles tested for the overall analysis in this study, the principles for selecting these vehicles were not clearly elaborated in Chapter 2.

**Response:** Thanks for your valuable comments. We further added the principles for selecting tested vehicles in Section 2.1:

Among the eight light-duty gasoline vehicles (vehicles #1 to #8), representation was provided from China IV, China V, and China VI emission standards. This is mainly since China’s current light-duty vehicle fleet is predominantly composed of China IV, China V, and China VI compliant vehicles. These vehicles featured two distinct engine techniques: Gasoline Direct Injection (GDI) and Port Fuel

Injection (PFI), all equipped with Three-Way Catalysts (TWC) converters. With the advancement of vehicular emission control technologies, GDI engines are progressively replacing traditional PFI engines due to their superior combustion efficiency, which is achieved by directly injecting fuel into the combustion chamber.

## References:

- Cai, H., and Xie, S.: Determination of emission factors from motor vehicles under different emission standards in China, *Acta Scientiarum Naturalium Universitatis Pekinensis*, 46, 319-326 (In Chinese), 2010.
- Clairotte, M., Suarez-Bertoa, R., Zardini, A. A., Giechaskiel, B., Pavlovic, J., Valverde, V., Ciuffo, B., and Astorga, C.: Exhaust emission factors of greenhouse gases (GHGs) from European road vehicles, *Environmental Sciences Europe*, 32, 125, [10.1186/s12302-020-00407-5](https://doi.org/10.1186/s12302-020-00407-5), 2020.
- Li, D., Yu, F., Zhang, R., Zhu, M., Liao, S., Lu, M., Guo, J., Wu, L., and Zheng, J.: Real-world greenhouse gas emission characteristics from in-use light-duty diesel trucks in China, *Science of The Total Environment*, 940, 173400, <https://doi.org/10.1016/j.scitotenv.2024.173400>, 2024.
- O'Driscoll, R., Stettler, M. E. J., Molden, N., Oxley, T., and ApSimon, H. M.: Real world CO<sub>2</sub> and NO<sub>x</sub> emissions from 149 Euro 5 and 6 diesel, gasoline and hybrid passenger cars, *Science of The Total Environment*, 621, 282-290, <https://doi.org/10.1016/j.scitotenv.2017.11.271>, 2018.
- Seo, J., Kim, H., and Park, S.: Estimation of CO<sub>2</sub> emissions from heavy-duty vehicles in Korea and potential for reduction based on scenario analysis, *Science of The Total Environment*, 636, 1192-1201, <https://doi.org/10.1016/j.scitotenv.2018.04.269>, 2018.
- Vojtišek-Lom, M., Beránek, V., Klír, V., Jindra, P., Pechout, M., and Voříšek, T.: On-road and laboratory emissions of NO, NO<sub>2</sub>, NH<sub>3</sub>, N<sub>2</sub>O and CH<sub>4</sub> from late-model EU light utility vehicles: Comparison of diesel and CNG, *Science of The Total Environment*, 616-617, 774-784, <https://doi.org/10.1016/j.scitotenv.2017.10.248>, 2018.
- Wang, Q., Cao, F., Fu, M., Su, S., Wang, M., Zhao, Z., Lin, Y., and Zhang, Y.: Emission factors of carbon dioxide from in-use vehicles based on bench testing, *Journal of Nanjing University of Information Science & Technology*, 14, 156-166 (In Chinese), 2022a.
- Wang, Y., Zhao, H., Yin, H., Yang, Z., Hao, L., Tan, J., Wang, X., Zhang, M., Li, J., Lyu, L., Wang, H., Wang, C., Tan, D., and Ge, Y.: Quantitative study of vehicle CO<sub>2</sub> emission at various temperatures and road loads, *Fuel*, 320, 123911, <https://doi.org/10.1016/j.fuel.2022.123911>, 2022b.
- Wu, Y., Zhang, S., Hao, J., Liu, H., Wu, X., Hu, J., Walsh, M. P., Wallington, T. J., Zhang, K. M., and Stevanovic, S.: On-road vehicle emissions and their control in China: A review and outlook, *Science of the Total Environment*, 574, 332-349, [10.1016/j.scitotenv.2016.09.040](https://doi.org/10.1016/j.scitotenv.2016.09.040), 2017.
- Yao, Z., Wang, Q., Wang, X., Zhang, Y., Shen, X., Yin, H., and He, K.: Inventory of non-routine pollutant emissions from typical urban motor vehicles, *Environmental Pollution & Control*, 33, 96-101 (In Chinese), 2011.
- Zhu, X.-h., He, H.-d., Lu, K.-f., Peng, Z.-r., and Gao, H. O.: Characterizing carbon emissions from China V and China VI gasoline vehicles based on portable emission measurement systems, *Journal of Cleaner Production*, 378, 134458, <https://doi.org/10.1016/j.jclepro.2022.134458>, 2022.
