# Supplementary material for: Measurement report: Insight into Greenhouse Gas Emission Characteristics of Light-Duty Vehicles in China Driven by Technological Innovation
Source: Copernicus journal article supplement (doi:10.5194/egusphere-2024-3095), 2024-11-11
Supplement: Supplementary file [file egusphere-2024-3095-AC2-supplement.pdf]

## Response to Reviewer #2:

### General comments:

This manuscript presents a comprehensive investigation into the characteristics of greenhouse gas (GHG) emissions from motor vehicles under various influencing factors, including emission standards, TWC operational status, cold/hot start modes, and power-train types. The study elucidates the evolving trends of GHG emissions during technological upgrades, providing critical data support for constructing GHG emission inventories while offering scientific basis for emission control strategies.

Focusing on the current research landscape where vehicular pollutant emissions have been extensively studied but GHG emissions remain under-investigated, this work makes significant contributions to complementing existing knowledge on vehicular emission characteristics. Particularly within the context of future carbon peak and neutrality goals, the findings provide crucial insights from the mobile source perspective to support continuous improvement of air quality.

However, the following comments should be addressed before this manuscript can be accepted. The English writing of this work should also be improved. As a result, I recommend a minor revision of this manuscript.

**Response:** Thank you for recognizing the manuscript and all of the constructive suggestions. We have taken all these valuable suggestions into account and have made corrections in this revised manuscript. Below is our response to the specific comments, highlighted in blue, with changes to the manuscript highlighted in red.

### Specific comments:

1. Introduction: In the third paragraph, please reorganize the research processes and results from the published papers. The current presentation merely lists the findings of individual studies without integrating them. Additionally, the authors have not explicitly identified the limitations in the existing research.

**Response:** Thank you for the valuable comment. We have reorganized the research processes and limitations of the existing research in Introduction.

Emission factors for GHGs for actual vehicles under different emission standards, temperature points and driving operating conditions were obtained (He et al., 2014; Zhong et al., 2023; Clairotte et al., 2020; Wang et al., 2022b). Specifically, CO<sub>2</sub> emissions for China VI (335 g/km) diesel vehicles have been reduced compared to China IV (415 g/km) and China V (447 g/km) vehicles (Li et al., 2024), and some studies reported CO<sub>2</sub> emissions for China VI gasoline vehicles were around 200 g/km to 300 g/km (Zhu et al., 2022; Wang et al., 2022b). The CH<sub>4</sub> emissions decreased from 48 mg/km for China I to 28 mg/km for China IV light-duty gasoline vehicles, and N<sub>2</sub>O emissions were reduced from 45 mg/km (China I) to 21 mg/km (China IV) (He et al., 2014). The CH<sub>4</sub> and N<sub>2</sub>O emissions for Euro V to Euro VI vehicles were found to be 7 mg/km (Clairotte et al., 2020), the average emission factors of CO<sub>2</sub> and CH<sub>4</sub> for light-duty vehicles in Thailand, which were 232.25 g/km and 9.50 mg/km,

respectively (Sirithian et al., 2022). With advancements in powertrain technologies, hybrid electric vehicles are being progressively promoted and have demonstrated significant potential in reducing both pollutant and CO<sub>2</sub> emissions (Selleri et al., 2022). Furthermore, from the model simulation perspective, computational models such as International Vehicle Emissions (IVE), Motor Vehicle Emission Simulator (MOVES), and Gompertz Growth Model have utilized to establish greenhouse gas emission inventories for different base years (Tang et al., 2018; Li et al., 2022; Zeng et al., 2016), even predict the future greenhouse gas emissions (Zeng et al., 2016).

Overall, from the perspective of GHG emissions from domestic vehicles in China, Yin et al. explored the GHG emissions of 84 China VI light-duty gasoline vehicles, indicating that vehicular GHG emissions generally tend to increase with engine displacement and the CO<sub>2</sub> increase rate caused by the CO<sub>2</sub> conversion of CH<sub>4</sub> and N<sub>2</sub>O emissions from all types of vehicles was less than 1%, suggesting that CO<sub>2</sub> emissions from vehicle exhaust remain the primary source of greenhouse gases (Yin et al., 2024). Nevertheless, existing research reveals a critical knowledge gap in systematic comparative analysis of CO<sub>2</sub>, CH<sub>4</sub>, and N<sub>2</sub>O emission profiles from vehicles certified under China's most stringent emission standards. Notably, old vehicles with deteriorated after-treatment systems have been confirmed as "super-emitters", contributing 50%-80% to total vehicular emissions while representing only 23% of the fleet composition (Huo et al., 2012). However, comprehensive understanding of GHG emission characteristics from these "super-emitters" remains incomplete. To address these gaps, the key investigations are urgently required, one is the comprehensive domestic emission profiles for vehicles complying with China's latest emission standards and their comparison with previous emission standards, another is the GHG emission characteristics from "super-emitters".

Additionally, we added a summary list of GHG emission factors in different studies in Table S1 in the Supplementary Information.

**Table S1** Comparison of CO<sub>2</sub>, CH<sub>4</sub>, and N<sub>2</sub>O emission factors in different studies.

| GH<br>G         | Tested vehicles                             | Fuel<br>types | Methods                | Emission factors                                                                                                                                                                                                                    | References                |
|-----------------|---------------------------------------------|---------------|------------------------|-------------------------------------------------------------------------------------------------------------------------------------------------------------------------------------------------------------------------------------|---------------------------|
| CO <sub>2</sub> | China 6                                     | Gasoline      | PEMS <sup>1</sup>      | 313.7 g/km (urban area, expressway)<br>304.4 g/km (suburban area, expressway)                                                                                                                                                       | (Zhu et al., 2022)        |
|                 | China 6                                     | Gasoline      | PEMS                   | 275.7 g/km (urban area, expressway)<br>273.9 g/km (suburban area, expressway)                                                                                                                                                       | (Zhu et al., 2022)        |
|                 | China 6                                     | Gasoline      | Chassis<br>dynamometer | ≈ 300 g/km (-10 °C, cold start, TWC <sup>2</sup> )<br>≈ 289 g/km (0 °C, cold start, TWC)<br>≈ 230 g/km (23 °C, cold start, TWC)<br>≈ 259 g/km (40 °C, cold start, TWC)                                                              | (Wang et al., 2022b)      |
|                 |                                             |               |                        | ≈ 257 g/km (-10 °C, cold start, TWC + GPF <sup>3</sup> )<br>≈ 259 g/km (0 °C, cold start, TWC + GPF)<br>≈ 210 g/km (23 °C, cold start, TWC + GPF)<br>≈ 238 g/km (40 °C, cold start, TWC + GPF)                                      |                           |
|                 | UK fleet using<br>2015 new car<br>sales car | Gasoline      | PEMS                   | 175.2 g/km (urban conditions, extra small displacement)<br>199.2 g/km (urban conditions, small displacement)<br>231.5 g/km (urban conditions, medium displacement)<br>340.9 g/km (urban conditions, large displacement)             | (O'Driscoll et al., 2018) |
|                 |                                             |               |                        | 140.6 g/km (motorway conditions, extra small displacement)<br>154.3 g/km (motorway conditions, small displacement)<br>174.4 g/km (motorway conditions, medium displacement)<br>213.0 g/km (motorway conditions, large displacement) |                           |
|                 | China 0 ~ China 2                           | Diesel        | IVE <sup>4</sup>       | 409.9 g/km                                                                                                                                                                                                                          | (Yao et al., 2011)        |
|                 | China 2                                     | Diesel        | COPERT <sup>5</sup>    | 245.8 g/km                                                                                                                                                                                                                          | (Cai and Xie, 2010)       |
|                 | China 3                                     | Diesel        | COPERT                 | 238.2 g/km                                                                                                                                                                                                                          | (Cai and Xie, 2010)       |
|                 | China 3                                     | Diesel        | PEMS                   | 304 g/km                                                                                                                                                                                                                            | (Wu et al., 2017)         |
|                 | China 4                                     | Diesel        | PEMS                   | 310 g/km                                                                                                                                                                                                                            |                           |
|                 | China 4                                     | Diesel        | COPERT                 | 238.2 g/km                                                                                                                                                                                                                          | (Cai and Xie, 2010)       |

|                 |                                       |             |                     |                                                       |                             |
|-----------------|---------------------------------------|-------------|---------------------|-------------------------------------------------------|-----------------------------|
|                 | China 4                               | Diesel      | Chassis dynamometer | 214.1 g/km (NEDC <sup>6</sup> )                       | (Wang et al., 2022a)        |
|                 |                                       |             |                     | 209.7 g/km (WLTC <sup>7</sup> )                       |                             |
|                 | China 4                               | Diesel      | PEMS                | 415.06 g/km                                           | (Li et al., 2024)           |
|                 | China 5                               | Diesel      | PEMS                | 447.48 g/km                                           |                             |
|                 | China 6                               | Diesel      | PEMS                | 335.26 g/km                                           |                             |
|                 | Euro 6                                | Diesel      | Chassis dynamometer | 239.0 g/km                                            | (Vojtišek-Lom et al., 2018) |
|                 |                                       |             |                     | 133 g/km                                              |                             |
|                 |                                       |             |                     | 134 g/km                                              |                             |
|                 | UK fleet using 2015 new car sales car | Diesel      | PEMS                | 141.9 g/km (urban conditions, small displacement)     | (O'Driscoll et al., 2018)   |
|                 |                                       |             |                     | 163.4 g/km (urban conditions, medium displacement)    |                             |
|                 |                                       |             |                     | 205.1 g/km (urban conditions, large displacement)     |                             |
|                 |                                       |             |                     | 137.1 g/km (motorway conditions, small displacement)  |                             |
| CH <sub>4</sub> | Heavy-duty vehicles in Korea          | Diesel      | Chassis dynamometer | 149.0 g/km (motorway conditions, medium displacement) | (Seo et al., 2018)          |
|                 |                                       |             |                     | 170.0 g/km (motorway conditions, large displacement)  |                             |
|                 |                                       |             |                     | 320 g/km (case 1)                                     |                             |
|                 |                                       |             |                     | 411 g/km (case 2)                                     |                             |
|                 |                                       |             |                     | 634 g/km (case 3)                                     |                             |
|                 |                                       |             |                     | 727 g/km (case 4)                                     |                             |
|                 |                                       |             |                     | 877 g/km (case 5)                                     |                             |
|                 | Euro 5                                | Gasoline    | Chassis dynamometer | 537 g/km (case 6)                                     | (Clairotte et al., 2020)    |
|                 |                                       |             |                     | 4.8 mg/km                                             |                             |
|                 |                                       |             |                     | 3.2 mg/km                                             |                             |
|                 |                                       |             |                     | 1.7 mg/km                                             |                             |
|                 |                                       |             |                     | 0.8 mg/km                                             |                             |
|                 |                                       |             |                     | 4.5 mg/km                                             |                             |
|                 | Euro 6b                               | Dual-LPG/Ga |                     | 2.3 mg/km                                             |                             |

|                  |                   |                 |                     |            |                             |
|------------------|-------------------|-----------------|---------------------|------------|-----------------------------|
|                  |                   | soline          |                     |            |                             |
|                  | Euro 5            | Diesel          |                     | 3.6 mg/km  |                             |
|                  | Euro 6b/c         | Diesel          |                     | 10.3 mg/km |                             |
|                  | Euro 6d-TEMP      | Diesel          |                     | 3.6 mg/km  |                             |
|                  | China 0           | Diesel          | COPERT              | 18 mg/km   | (Wang et al., 2022a)        |
|                  | China 1           | Diesel          | COPERT              | 11 mg/km   |                             |
|                  | China 2           | Diesel          | COPERT              | 5 mg/km    |                             |
|                  | China 0 ~ China 2 | Diesel          | IVE                 | 90 mg/km   | (Yao et al., 2011)          |
|                  | China 2           | Diesel          | COPERT              | 7 mg/km    | (Cai and Xie, 2010)         |
|                  | China 3           | Diesel          | COPERT              | 2 mg/km    | (Wang et al., 2022a)        |
|                  | China 3           | Diesel          | COPERT              | 0 mg/km    | (Cai and Xie, 2010)         |
|                  | China 4           | Diesel          | COPERT              | 1 mg/km    | (Wang et al., 2022a)        |
|                  | China 4           | Diesel          | COPERT              | 0 mg/km    | (Cai and Xie, 2010)         |
|                  | China 4           | Diesel          | PEMS                | 5 mg/km    | (Li et al., 2024)           |
|                  | China 5           | Diesel          | COPERT              | 1 mg/km    | (Wang et al., 2022a)        |
|                  | China 5           | Diesel          | PEMS                | 3 mg/km    | (Li et al., 2024)           |
|                  | China 6           | Diesel          | PEMS                | 3 mg/km    | (Li et al., 2024)           |
|                  | Euro 6            | Diesel          | Chassis dynamometer | 3 mg/km    | (Vojtíšek-Lom et al., 2018) |
|                  |                   |                 |                     | 5 mg/km    |                             |
|                  |                   |                 |                     | 7 mg/km    |                             |
| N <sub>2</sub> O | Euro 5            | Gasoline        | Chassis dynamometer | 3.1 mg/km  | (Clairotte et al., 2020)    |
|                  | Euro 6b/c         | Gasoline        |                     | 0.9 mg/km  |                             |
|                  | Euro 6d-TEMP      | Gasoline        |                     | 0.3 mg/km  |                             |
|                  | Euro 5            | Gasoline hybrid |                     | 0.3 mg/km  |                             |
|                  | Euro 6b           | Gasoline hybrid |                     | 3.2 mg/km  |                             |
|                  | Euro 6b           | Dual-LPG/Ga     |                     | 0.9 mg/km  |                             |

|  |                   |        |                        |            |                             |
|--|-------------------|--------|------------------------|------------|-----------------------------|
|  |                   | soline |                        |            |                             |
|  | Euro 5            | Diesel |                        | 6.2 mg/km  |                             |
|  | Euro 6b/c         | Diesel |                        | 13.5 mg/km |                             |
|  | Euro 6d-TEMP      | Diesel |                        | 15.2 mg/km |                             |
|  | China 0 ~ China 2 | Diesel | IVE                    | 197 mg/km  | (Yao et al., 2011)          |
|  | China 0           | Diesel | COPERT                 | 0 mg/km    | (Wang et al., 2022a)        |
|  | China 1           | Diesel | COPERT                 | 2 mg/km    |                             |
|  | China 2           | Diesel | COPERT                 | 5 mg/km    |                             |
|  | China 2           | Diesel | COPERT                 | 167 mg/km  | (Cai and Xie, 2010)         |
|  | China 3           | Diesel | COPERT                 | 8 mg/km    | (Wang et al., 2022a)        |
|  | China 3           | Diesel | COPERT                 | 200 mg/km  | (Cai and Xie, 2010)         |
|  | China 4           | Diesel | COPERT                 | 8 mg/km    | (Wang et al., 2022a)        |
|  | China 4           | Diesel | COPERT                 | 200 mg/km  | (Cai and Xie, 2010)         |
|  | China 4           | Diesel | PEMS                   | 2 mg/km    | (Li et al., 2024)           |
|  | China 4           | Diesel | COPERT                 | 8 mg/km    | (Wang et al., 2022a)        |
|  | China 5           | Diesel | PEMS                   | 4 mg/km    | (Li et al., 2024)           |
|  | China 6           | Diesel | PEMS                   | 3 mg/km    | (Li et al., 2024)           |
|  | Euro 6            | Diesel | Chassis<br>dynamometer | 13 mg/km   | (Vojtíšek-Lom et al., 2018) |
|  |                   |        |                        | 5 mg/km    |                             |
|  |                   |        |                        | 7 mg/km    |                             |

**Notes:**

<sup>1</sup> Portable Emission Measurement System

<sup>2</sup> Three-Way Catalyst

<sup>3</sup> Gasoline Particulate Filter

<sup>4</sup> International Vehicle Emissions model

<sup>5</sup> Computer Programme to Calculate Emissions from Road Transport

<sup>6</sup> New European Driving Cycle

<sup>7</sup> Worldwide Harmonized Light Vehicles Test Cycle

2. Introduction: In the background section, succinctly summarize why it is important to test hybrid vehicle exhaust greenhouse gas emissions. Describe the unique characteristics of hybrid vehicle exhaust emissions and discuss the effects of post-treatment technologies on exhaust emissions in vehicles.

**Response:** Thank you for the helpful suggestions, and we added the detailed information on HEVs and post-treatment in the *Introduction*:

Additionally, the population of light-duty hybrid electric vehicles in China is currently experiencing rapid growth. However, comprehensive research on their GHG emission profiles remains inadequate. Precise quantification of GHG emissions from HEVs is crucial for developing effective strategies to mitigate emissions from the light-duty vehicle sectors. Meanwhile, the Three-Way Catalysts (TWC) system remains the predominant post-treatment technology for gasoline vehicles. This catalytic system facilitates the abatement of exhaust pollutants by catalyzing the oxidation of carbon monoxide (CO) and unburned total hydrocarbons (THC), alongside the reduction of nitrogen oxides (NO<sub>x</sub>). Notably, the NO<sub>x</sub> reduction process involves undesirable side reactions, particularly the interaction between NO and nitrogen species on the catalyst, resulting in the formation of N<sub>2</sub>O (Wallington and Wiesen, 2014).

3. Line 100-105: How was the determination made that the TWC failed? Does a mileage of approximately 27 km necessarily indicate failure? Are the authors referring to TWC degradation here?

**Response:** We sincerely appreciate your constructive feedback. Regarding this issue, our consideration was indeed insufficiently comprehensive. As you pointed out, high mileage does not necessarily indicate TWC failure, but rather reflects performance degradation, despite of their substantially elevated CO and THC emissions (see Figure S1 in the Supplementary Information). As suggested, we have revised “TWC failed” to “TWC deteriorated”.

Since the “TWC failed” appears frequently in the manuscript, we have uniformly revised it to “TWC degradation” throughout the manuscript and will not list each instance here. Furthermore, we added some information on Figure S1 in Section 2.1:

Figure S1 in the Supplementary Information demonstrates the emission characteristics of the two vehicles representing distinct TWC operational states: (1) a properly functioning under the “TWC worked” condition and (2) a degraded system under the “TWC deteriorated” condition. The analysis revealed that the “TWC deteriorated” vehicle emitted substantially higher levels of carbon monoxide (CO) and total hydrocarbons (THC), with emission factors elevated by over 24-fold and 97-fold, respectively, compared to the “TWC worked” vehicle.

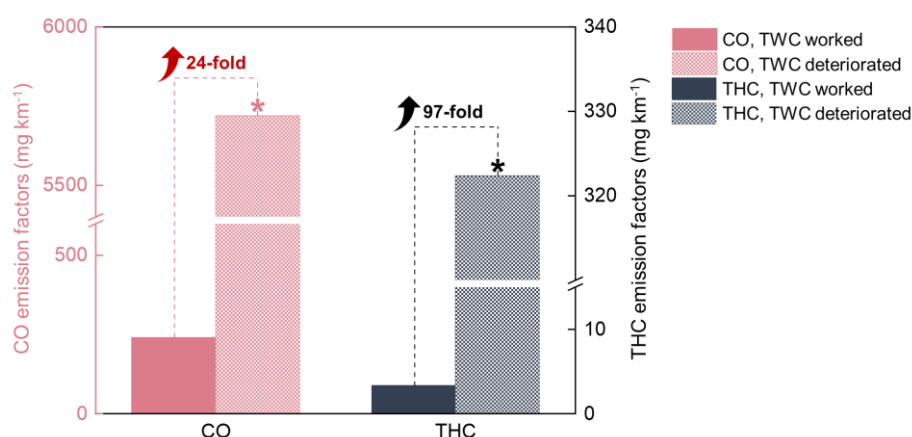

Figure S1. CO and THC emission factors from the fueled taxi fueled by conventional gasoline under the “TWC worked” and “TWC deteriorated” conditions under the WLTC protocol. The symbol \* represents that the pollutant concentrations exceeded the upper limit of the measurement instrument.

4. Introduction: Based on the latest 2023 data, provide an overview of the passenger vehicle ownership growth trends in China.

**Response:** Thanks for your valuable suggestions. Based on the latest reported data, we have performed corresponding updates:

In 2023, the number of motor vehicles in China had reached 435.6 million; Among them, the number of automobiles reached 336 million, a year-on-year increase of 5.3% (Ministry of Ecology and Environment, 2024).

5. Section 2: To provide a more intuitive representation of the experimental process, it is recommended that the authors include a schematic diagram of the experiment.

**Response:** Thanks for your helpful suggestions. We have added the schematic diagram in the revised manuscript in Section 2.2.

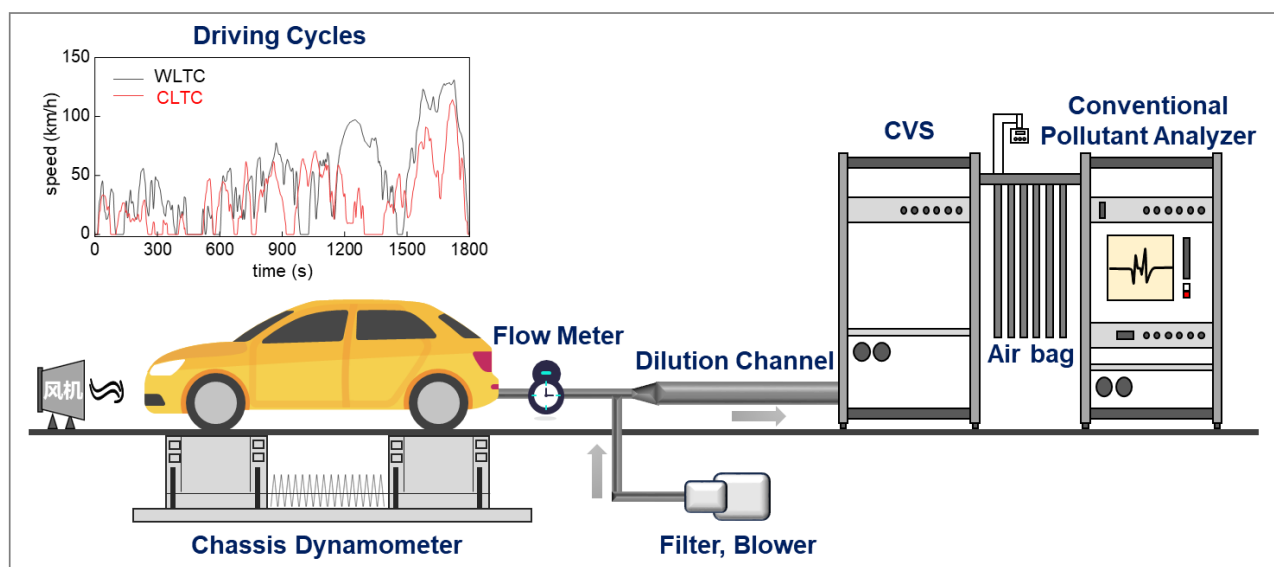



**Figure 1:** Schematic diagram for vehicular emission measurements based on chassis dynamometer in this study.

6. Section 3.2: What is the ethanol content in Chinese gasoline? How does the ethanol content affect greenhouse gas emissions from vehicle exhaust?

**Response:** Thanks for your helpful suggestions. The ethanol content in Chinese gasoline is usually 10%, which is E10 ethanol gasoline. We have added more detailed information on ethanol gasoline in Section 3.2:

Nevertheless, previous studies have revealed that ethanol gasoline would increase the emissions of Non-Methane Organic Gases (NMOG), acetaldehydes, 1,3-butadiene, and benzene; and no statistically significant changes in NO<sub>x</sub>, CO<sub>2</sub>, CH<sub>4</sub>, N<sub>2</sub>O or formaldehyde emissions (Graham et al., 2008). When using gasoline with higher ethanol concentrations (e.g., E85), distinct emission characteristics can be observed. The NO<sub>x</sub>, 1,3-butadiene, and benzene are significantly reduced, while the emissions of formaldehyde and acetaldehyde increase statistically significantly. In contrast, there are no statistically changes in the emissions of CO, CO<sub>2</sub>, or NMOG (Graham et al., 2008).

7. Line 315-320: The authors only mention that hybrid vehicles exhibit higher combustion efficiency but provide no experimental data to support this claim. If relevant data is available, please conduct a quantitative comparison between the combustion efficiency of hybrid vehicles and conventional fuel-powered vehicles.

**Response:** Thanks for your valuable comments. We further the description in Section 3.3:

For example, the analysis of CO emissions from hybrid vehicles reveals significant advantages when compared against conventional fuel-powered vehicles. Specifically, during cold starts, hybrid vehicles exhibit a CO emission factor of 70.9 mg/km, whereas their conventional counterparts register 95.7 mg/km, reflecting a 26.8% reduction in CO emissions under these conditions. Similarly, during hot starts, hybrid vehicles achieve an impressive CO emission factor of 43.3 mg/km, compared to the 71.9 mg/km emitted by conventional vehicles, demonstrating an 40.5% decrease. This indicates that hybrid vehicles have more advantages in terms of combustion efficiency comparison.

## References:

- Cai, H., and Xie, S.: Determination of emission factors from motor vehicles under different emission standards in China, *Acta Scientiarum Naturalium Universitatis Pekinensis*, 46, 319-326 (In Chinese), 2010.
- Clairotte, M., Suarez-Bertoa, R., Zardini, A. A., Giechaskiel, B., Pavlovic, J., Valverde, V., Ciuffo, B., and Astorga, C.: Exhaust emission factors of greenhouse gases (GHGs) from European road vehicles, *Environmental Sciences Europe*, 32, 125, 10.1186/s12302-020-00407-5, 2020.
- Graham, L. A., Belisle, S. L., and Baas, C.-L.: Emissions from light duty gasoline vehicles operating on low blend ethanol gasoline and E85, *Atmospheric Environment*, 42, 4498-4516,

<https://doi.org/10.1016/j.atmosenv.2008.01.061>, 2008.

- He, L., Song, J., Hu, J., Xie, S., and Zu, L.: An investigation of the CH<sub>4</sub> and N<sub>2</sub>O emission factors of light-duty gasoline vehicles, *Environmental Science*, 35, 4489-4494, 2014.
- Huo, H., Yao, Z., Zhang, Y., Shen, X., Zhang, Q., Ding, Y., and He, K.: On-board measurements of emissions from light-duty gasoline vehicles in three mega-cities of China, *Atmospheric Environment*, 49, 371-377, [10.1016/j.atmosenv.2011.11.005](https://doi.org/10.1016/j.atmosenv.2011.11.005), 2012.
- Li, D., Yu, F., Zhang, R., Zhu, M., Liao, S., Lu, M., Guo, J., Wu, L., and Zheng, J.: Real-world greenhouse gas emission characteristics from in-use light-duty diesel trucks in China, *Science of The Total Environment*, 940, 173400, <https://doi.org/10.1016/j.scitotenv.2024.173400>, 2024.
- Li, G., Gao, J., Deng, S., Sun, Z., Zhang, S., Lu, Z., Lu, P., Zhang, Y., Abula, T., and Li, Q.: A study on high temporal-spatial resolution emission inventory and its characteristics of greenhouse gas for on-road mobile source in Weinan, *Acta Scientiae Circumstantiae*, 332-340, [10.13671/j.hjkxxb.2022.0215](https://doi.org/10.13671/j.hjkxxb.2022.0215), 2022.
- Ministry of Ecology and Environment, C.: China Mobile Source Environmental Management Annual Report, [https://www.mee.gov.cn/hjzl/sthjzk/ydyhjgl/202503/t20250326\\_1104757.shtml](https://www.mee.gov.cn/hjzl/sthjzk/ydyhjgl/202503/t20250326_1104757.shtml), 2024.
- O'Driscoll, R., Stettler, M. E. J., Molden, N., Oxley, T., and ApSimon, H. M.: Real world CO<sub>2</sub> and NO<sub>x</sub> emissions from 149 Euro 5 and 6 diesel, gasoline and hybrid passenger cars, *Science of The Total Environment*, 621, 282-290, <https://doi.org/10.1016/j.scitotenv.2017.11.271>, 2018.
- Selleri, T., Melas, A. D., Franzetti, J., Ferrarese, C., Giechaskiel, B., and Suarez-Bertoa, R.: On-Road and Laboratory Emissions from Three Gasoline Plug-In Hybrid Vehicles—Part 1: Regulated and Unregulated Gaseous Pollutants and Greenhouse Gases, in: *Energies*, 7, 2022.
- Seo, J., Kim, H., and Park, S.: Estimation of CO<sub>2</sub> emissions from heavy-duty vehicles in Korea and potential for reduction based on scenario analysis, *Science of The Total Environment*, 636, 1192-1201, <https://doi.org/10.1016/j.scitotenv.2018.04.269>, 2018.
- Sirithian, D., Thanatrakolsri, P., and Pongpan, S.: CO<sub>2</sub> and CH<sub>4</sub> Emission Factors from Light-Duty Vehicles by Fuel Types in Thailand, in: *Atmosphere*, 10, 2022.
- Tang, W., He, P., Yang, Q., Lu, Q., Zheng, S., Xia, Y., Jing, B., LU, B., Huang, C., and Lu, J.: Study on greenhouse gas emission inventory of road source in Hangzhou based on IVE model and large data analysis, *Acta Scientiae Circumstantiae*, 1368-1376, [10.13671/j.hjkxxb.2017.0493](https://doi.org/10.13671/j.hjkxxb.2017.0493), 2018.
- Vojtišek-Lom, M., Beránek, V., Klír, V., Jindra, P., Pechout, M., and Voříšek, T.: On-road and laboratory emissions of NO, NO<sub>2</sub>, NH<sub>3</sub>, N<sub>2</sub>O and CH<sub>4</sub> from late-model EU light utility vehicles: Comparison of diesel and CNG, *Science of The Total Environment*, 616-617, 774-784, <https://doi.org/10.1016/j.scitotenv.2017.10.248>, 2018.
- Wallington, T. J., and Wiesen, P.: N<sub>2</sub>O emissions from global transportation, *Atmospheric Environment*, 94, 258-263, <https://doi.org/10.1016/j.atmosenv.2014.05.018>, 2014.
- Wang, Q., Cao, F., Fu, M., Su, S., Wang, M., Zhao, Z., Lin, Y., and Zhang, Y.: Emission factors of carbon dioxide from in-use vehicles based on bench testing, *Journal of Nanjing University of Information Science & Technology*, 14, 156-166 (In Chinese), 2022a.
- Wang, Y., Zhao, H., Yin, H., Yang, Z., Hao, L., Tan, J., Wang, X., Zhang, M., Li, J., Lyu, L., Wang, H., Wang, C., Tan, D., and Ge, Y.: Quantitative study of vehicle CO<sub>2</sub> emission at various temperatures and road loads, *Fuel*, 320, 123911, <https://doi.org/10.1016/j.fuel.2022.123911>, 2022b.
- Wu, Y., Zhang, S., Hao, J., Liu, H., Wu, X., Hu, J., Walsh, M. P., Wallington, T. J., Zhang, K. M., and Stevanovic, S.: On-road vehicle emissions and their control in China: A review and outlook, *Science of the Total Environment*, 574, 332-349, [10.1016/j.scitotenv.2016.09.040](https://doi.org/10.1016/j.scitotenv.2016.09.040), 2017.

- Yao, Z., Wang, Q., Wang, X., Zhang, Y., Shen, X., Yin, H., and He, K.: Inventory of non-routine pollutant emissions from typical urban motor vehicles, *Environmental Pollution & Control*, 33, 96-101 (In Chinese), 2011.
- Yin, D., Ai, L., and Weng, Y.: Greenhouse gas emissions characteristics of China VI light-duty gasoline vehicles, *China Environmental Science*, 44, 679-685, 2024.
- Zeng, Y., Tan, X., Gu, B., Wang, Y., and Xu, B.: Greenhouse gas emissions of motor vehicles in Chinese cities and the implication for China's mitigation targets, *Applied Energy*, 184, 1016-1025, <https://doi.org/10.1016/j.apenergy.2016.06.130>, 2016.
- Zhong, H., Yu, F., Liao, S., ZHU, M., Duan, J., Sha, Q. e., Liu, J., and Zheng, J.: Development and evaluation of methane emission factor model for light-duty gasoline vehicles based on on-road driving tests, *Acta Scientiae Circumstantiae*, 43, 176-184, 2023.
- Zhu, X.-h., He, H.-d., Lu, K.-f., Peng, Z.-r., and Gao, H. O.: Characterizing carbon emissions from China V and China VI gasoline vehicles based on portable emission measurement systems, *Journal of Cleaner Production*, 378, 134458, <https://doi.org/10.1016/j.jclepro.2022.134458>, 2022.
